# Supplementary material
Source: HighWire-hosted journal article supplement (https://injuryprevention.bmj.com/content/30/1/60)

Supplementary File 4 – Most frequently reported twice-monthly participation by individual activity for Active Lives Surveys. Boxing is inclusive of boxing fitness classes, and rowing is inclusive of indoor rowing. Combined and population-weighted estimates for Active Lives Surveys 2016-17 and 2017-18.

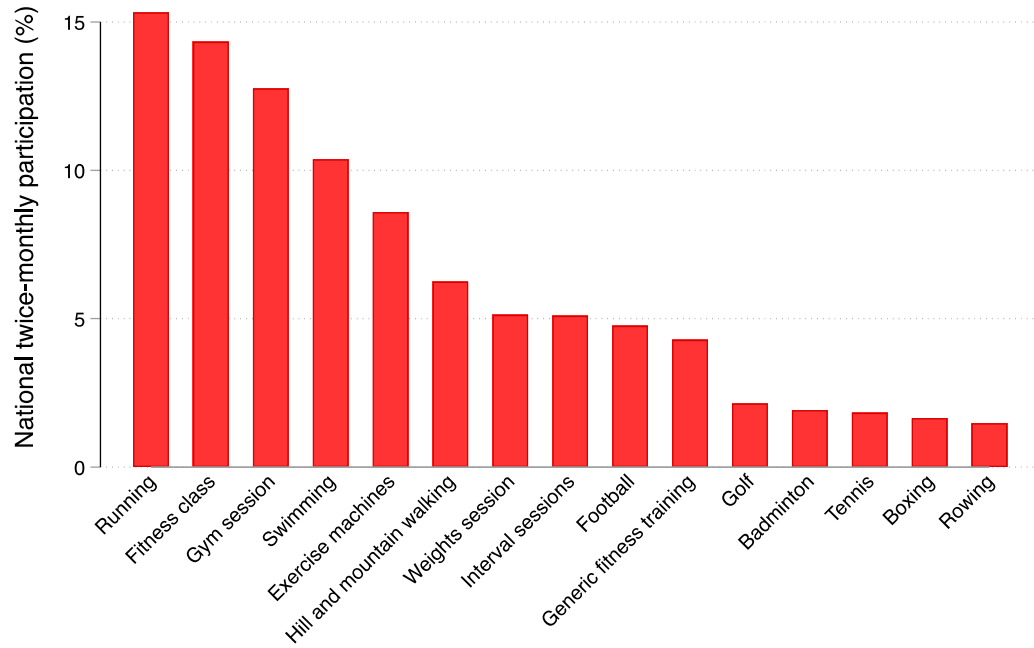

Supplement: inline-supplementary-material-4 [file inline-supplementary-material-4.pdf]
